# Supplementary material for: Lignans from the Roots and Rhizomes of Dysosma versipellis and Their Cytotoxic Activities
Source: MDPI journal article supplement (doi:10.3390/molecules28072909), 2023-03-24
Supplement: s1 [file s1]

# Lignans from the roots and rhizomes of *Dysosma versipellis* and their cytotoxic activities

Yanjuan Sun <sup>1,2,3\*</sup>, Haojie Wang <sup>1,2</sup>, Ruijie Han <sup>1,2</sup>, Hongyun Bai <sup>1,2</sup>, Meng Li <sup>1,2</sup>, Junmin Wang <sup>1,2</sup>, and Weisheng Feng <sup>1,2\*</sup>

<sup>1</sup> Collaborative Innovation Center for Respiratory Disease Diagnosis and Treatment & Chinese Medicine, Development of Henan Province, Henan University of Chinese Medicine, Zhengzhou 450046, China

<sup>2</sup> School of Pharmacy, Henan University of Chinese Medicine, Zhengzhou 450046, China

<sup>3</sup> Henan Research Center for Special Processing Technology of Chinese Medicine, 450046, China

\* Correspondence: sunyanjuan2011@hactcm.edu.cn (Y.S.); fwsh@hactcm.edu.cn (W.F.);  
Tel.: +86-371-6596-2746 (Y.S. & W.F.)

**Abstract:** One new dibenzyltyrolactone lignan dysoslignan A (**1**), three new aryl-naphthalide lignans dysoslignan B–C (**2–4**), along with fourteen known metabolites (**5–18**), were isolated from the roots and rhizomes of *Dysosma versipellis*. Their structures and stereochemistry were determined from analysis of NMR spectroscopic and circular dichroism (CD) data. Compound **2** represents the first report of naturally occurring aryl-naphthalide lignan triglycoside. The cytotoxic activities of all isolated compounds were evaluated against A-549 and SMMC-7721 cell lines. Compounds **7–10**, and **14–16** were more toxic than cisplatin in two tumor cell lines. This investigation clarifies the potential effective substance basis of *D. versipellis* in tumor treatment.

**Keywords:** *Dysosma versipellis*; dibenzyltyrolactone; aryl-naphthalide; cytotoxic

## Table of Contents

|                                                                                                     |    |
|-----------------------------------------------------------------------------------------------------|----|
| Figure S1. <sup>1</sup> H NMR spectrum (500 MHz) of <b>1</b> in DMSO- <i>d</i> <sub>6</sub> .....   | 3  |
| Figure S2. <sup>13</sup> C NMR spectrum (125 MHz) of <b>1</b> in DMSO- <i>d</i> <sub>6</sub> .....  | 3  |
| Figure S3. HSQC spectrum of <b>1</b> .....                                                          | 4  |
| Figure S4. HMBC spectrum of <b>1</b> .....                                                          | 4  |
| Figure S5 DEPT spectrum of <b>1</b> .....                                                           | 5  |
| Figure S6 <sup>1</sup> H- <sup>1</sup> H-COSY spectrum of <b>1</b> .....                            | 5  |
| Figure S7. NOESY spectrum of <b>1</b> .....                                                         | 6  |
| Figure S8. ECD spectrum of <b>1</b> .....                                                           | 6  |
| Figure S9. HR-ESI-MS spectrum of <b>1</b> .....                                                     | 7  |
| Figure S10. <sup>1</sup> H NMR spectrum (500 MHz) of <b>2</b> in DMSO- <i>d</i> <sub>6</sub> .....  | 7  |
| Figure S11. <sup>13</sup> C NMR spectrum (125 MHz) of <b>2</b> in DMSO- <i>d</i> <sub>6</sub> ..... | 8  |
| Figure S12. HSQC spectrum of <b>2</b> .....                                                         | 8  |
| Figure S13. HMBC spectrum of <b>2</b> .....                                                         | 9  |
| Figure S14. DEPT spectrum of <b>2</b> .....                                                         | 9  |
| Figure S15. <sup>1</sup> H- <sup>1</sup> H-COSY spectrum of <b>2</b> .....                          | 10 |
| Figure S16. NOESY spectrum of <b>2</b> .....                                                        | 10 |
| Figure S17. ECD spectrum of <b>2</b> .....                                                          | 11 |
| Figure S18. HR-ESI-MS spectrum of <b>2</b> .....                                                    | 11 |
| Figure S19. <sup>1</sup> H NMR spectrum (500 MHz) of <b>3</b> in DMSO- <i>d</i> <sub>6</sub> .....  | 12 |
| Figure S20. <sup>13</sup> C NMR spectrum (125 MHz) of <b>3</b> in DMSO- <i>d</i> <sub>6</sub> ..... | 12 |
| Figure S21. HSQC spectrum of <b>3</b> .....                                                         | 13 |
| Figure S22. HMBC spectrum of <b>3</b> .....                                                         | 13 |
| Figure S23. HR-ESI-MS spectrum of <b>3</b> .....                                                    | 14 |
| Figure S24. <sup>1</sup> H NMR spectrum (500 MHz) of <b>3</b> in DMSO- <i>d</i> <sub>6</sub> .....  | 14 |
| Figure S25. <sup>13</sup> C NMR spectrum (125 MHz) of <b>3</b> in DMSO- <i>d</i> <sub>6</sub> ..... | 15 |
| Figure S26. HSQC spectrum of <b>4</b> .....                                                         | 15 |
| Figure S27. HMBC spectrum of <b>4</b> .....                                                         | 16 |
| Figure S28. HR-ESI-MS spectrum of <b>4</b> .....                                                    | 16 |

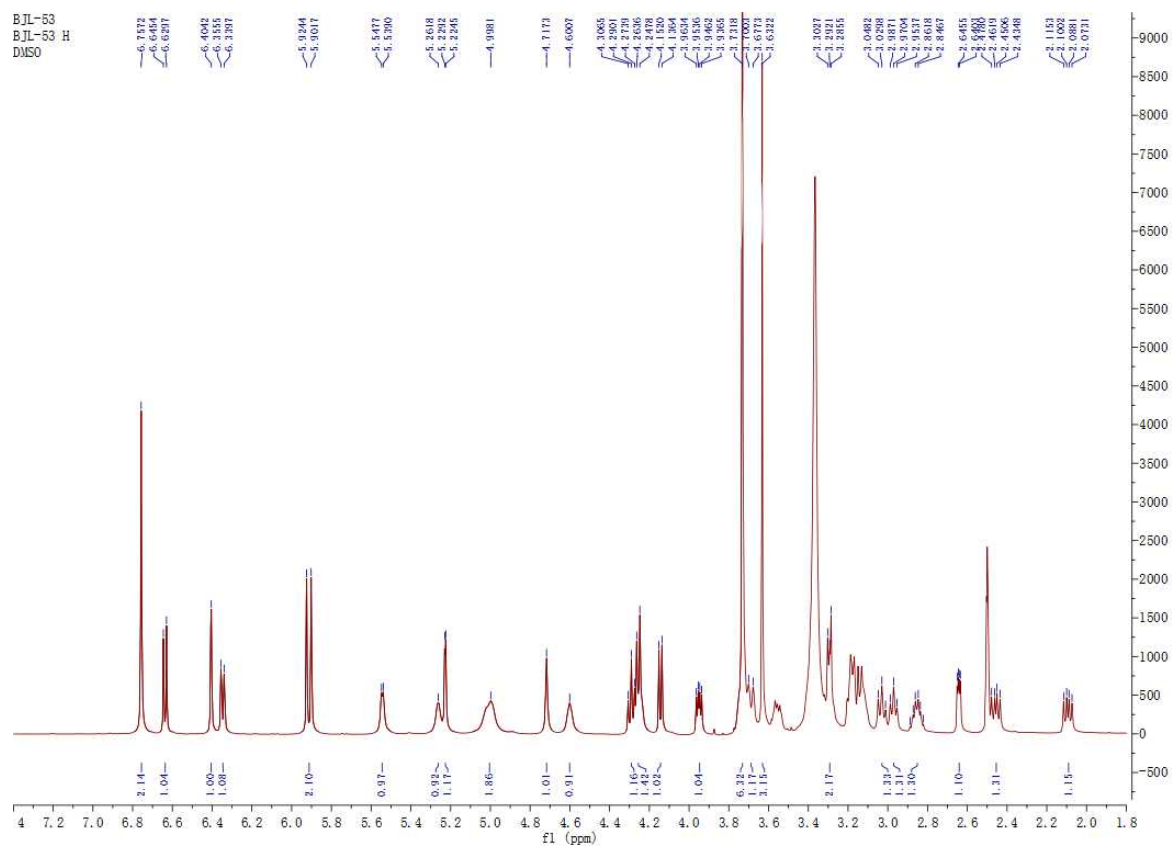

Figure S1.  $^1\text{H}$  NMR spectrum of **1** (500 MHz,  $\text{DMSO}-d_6$ )

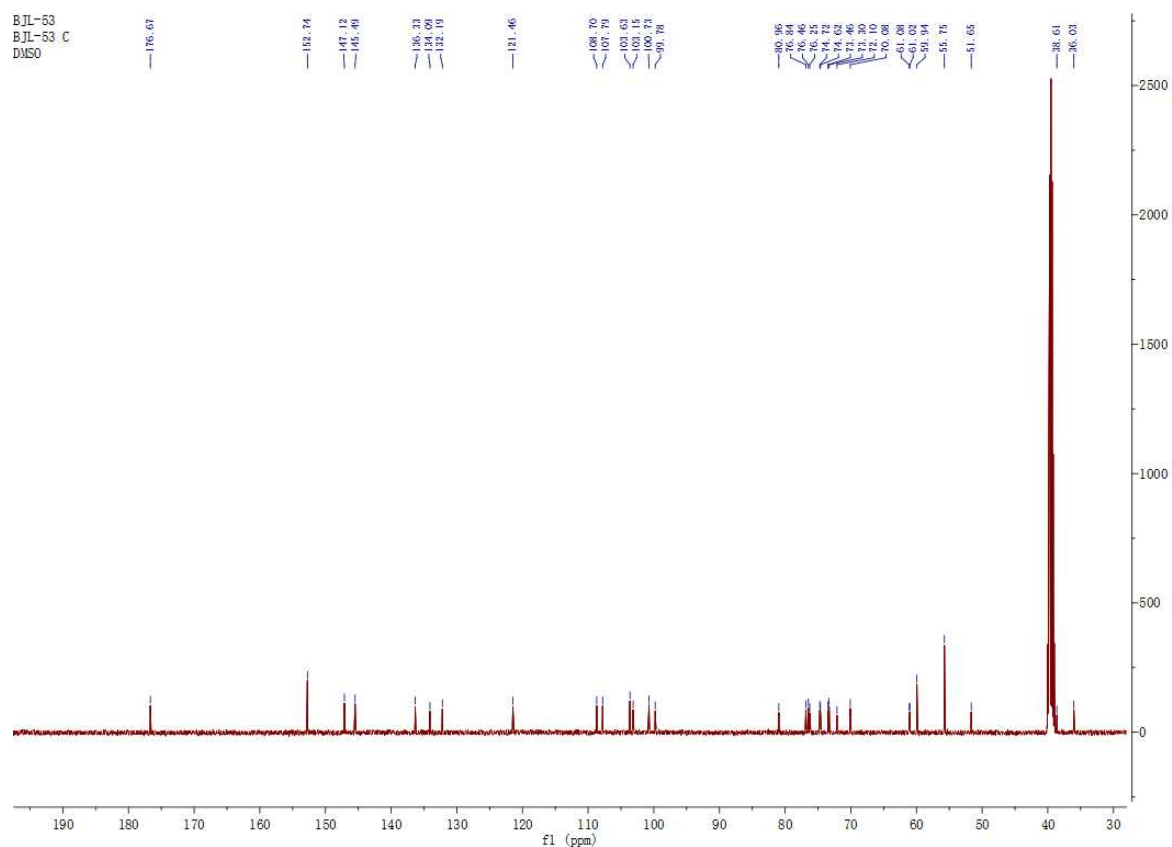

Figure S2.  $^{13}\text{C}$  NMR spectrum of **1** (125 MHz, DMSO- $d_6$ )

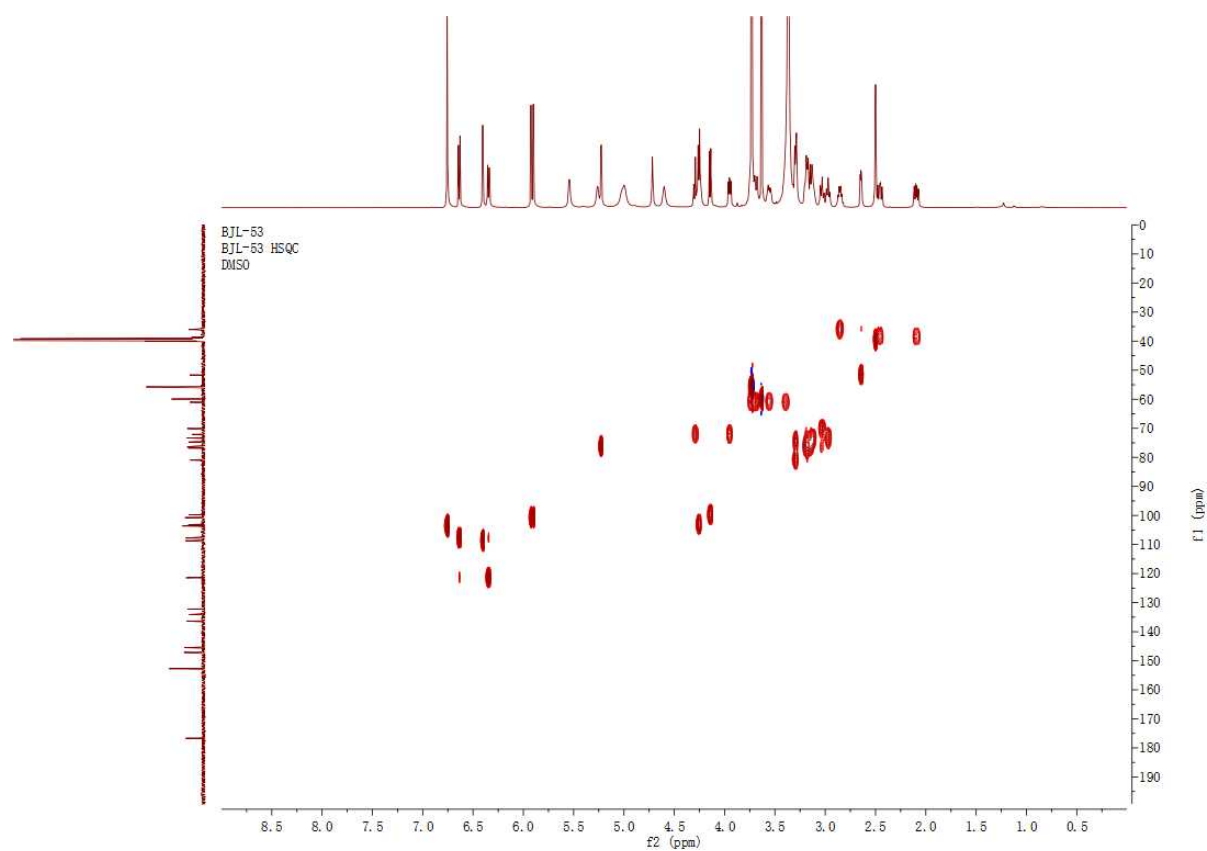

Figure S3. HSQC spectrum of **1**

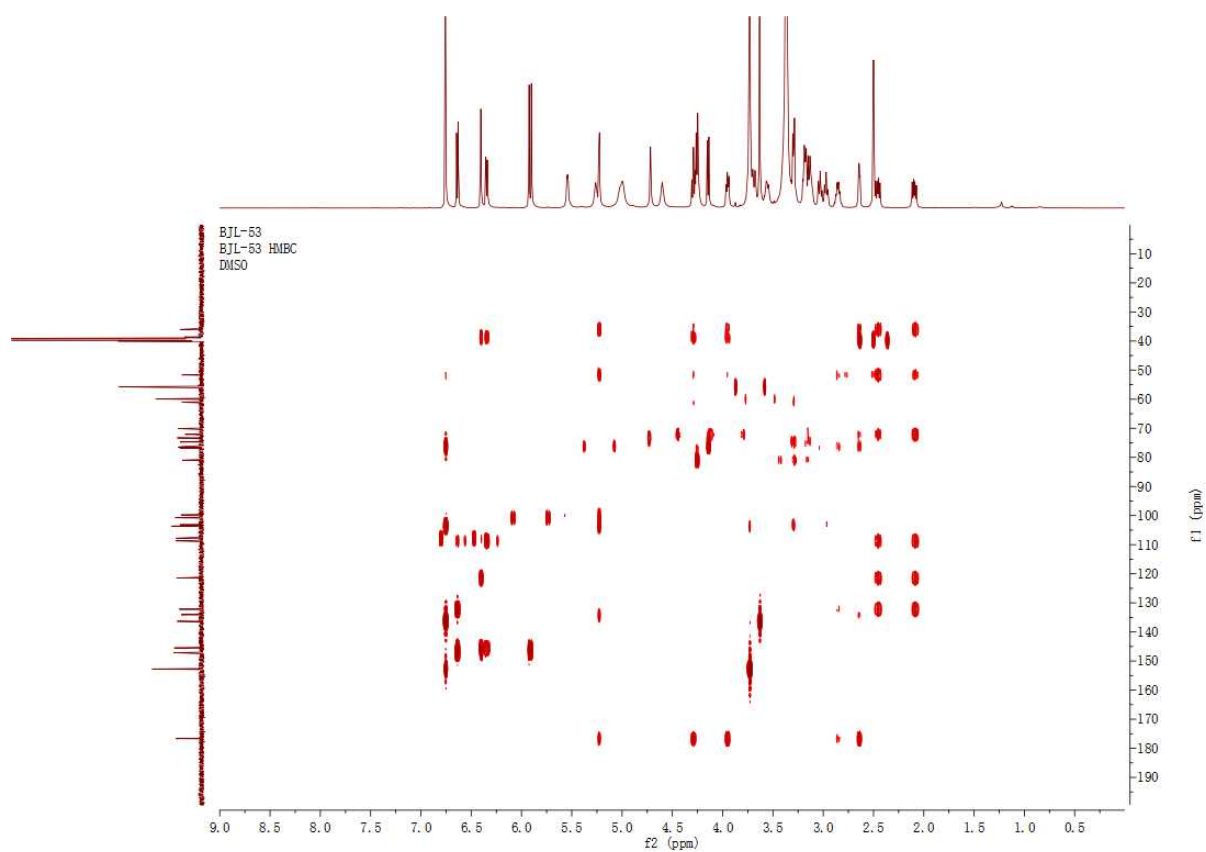

Figure S4. HMBC spectrum of **1**

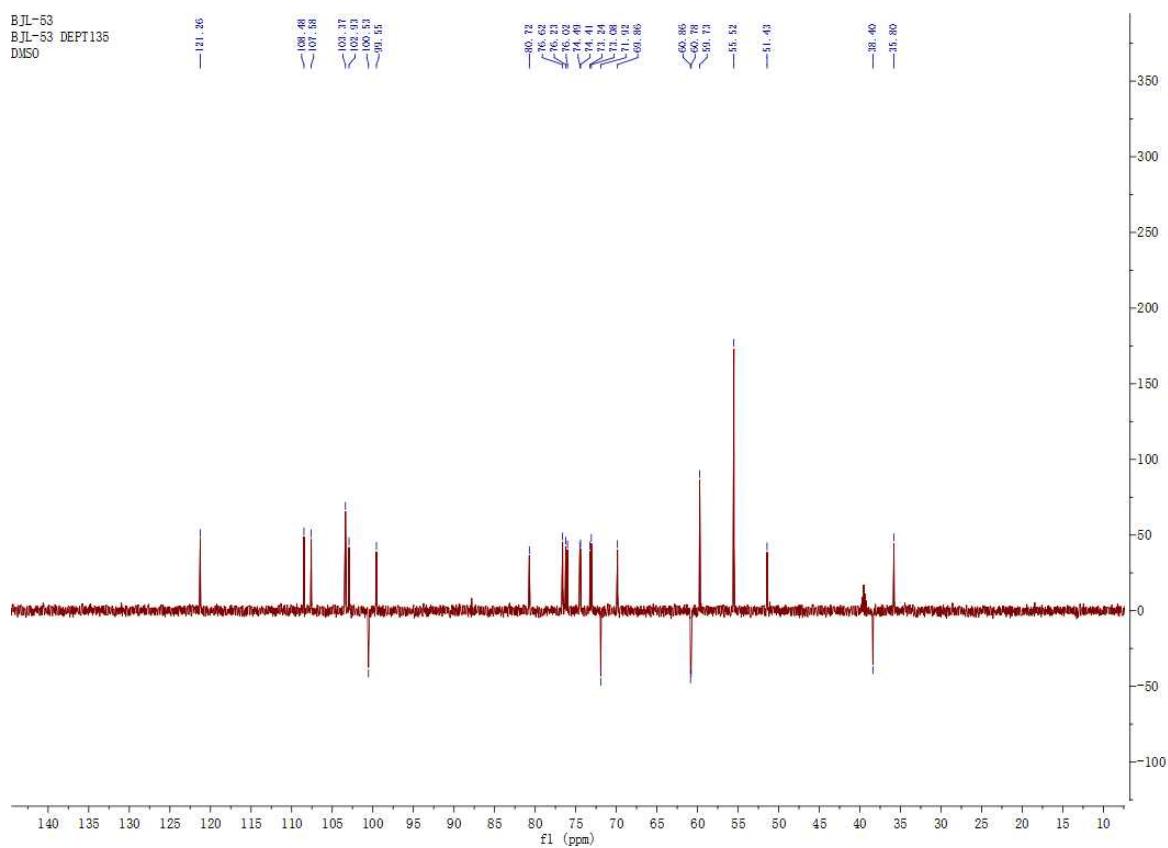

Figure S5. DEPT spectrum of **1**

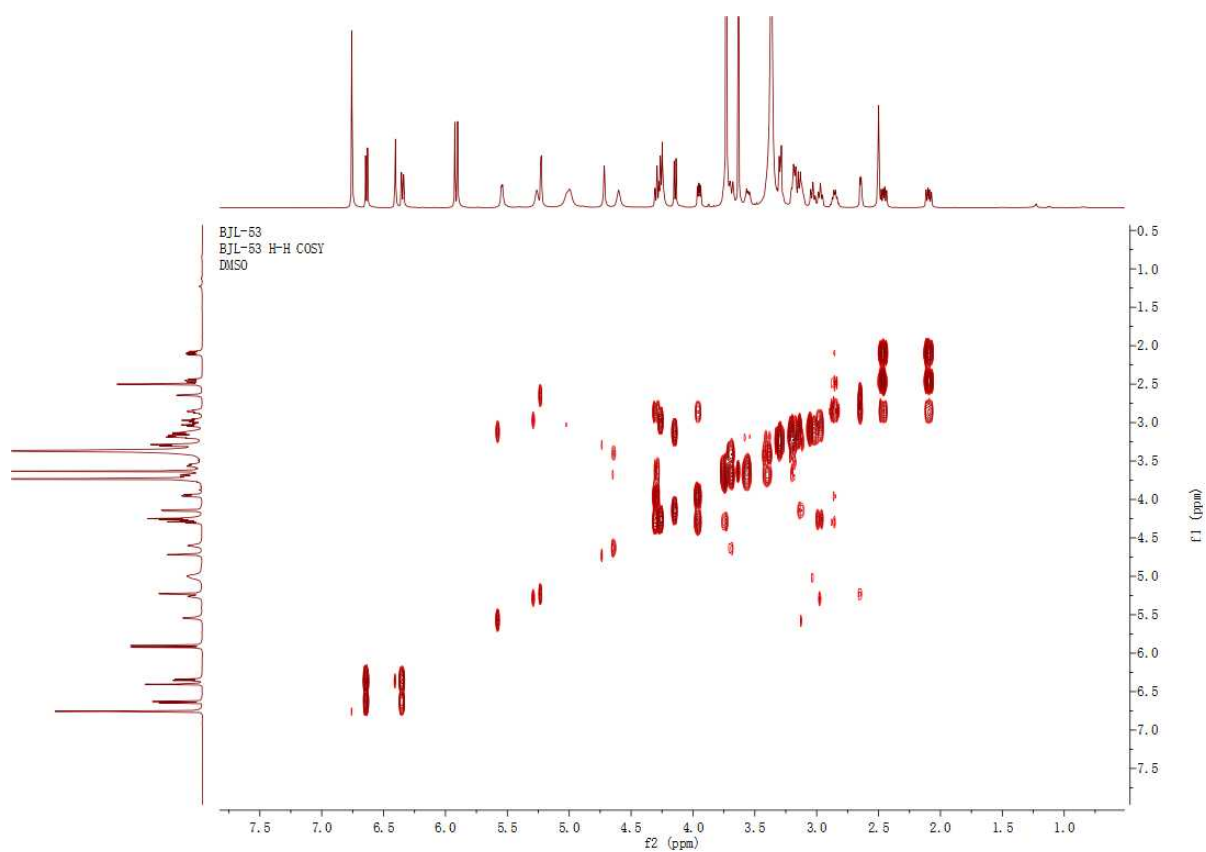

Figure S6.  $^1\text{H}$ - $^1\text{H}$ -COSY spectrum of **1**

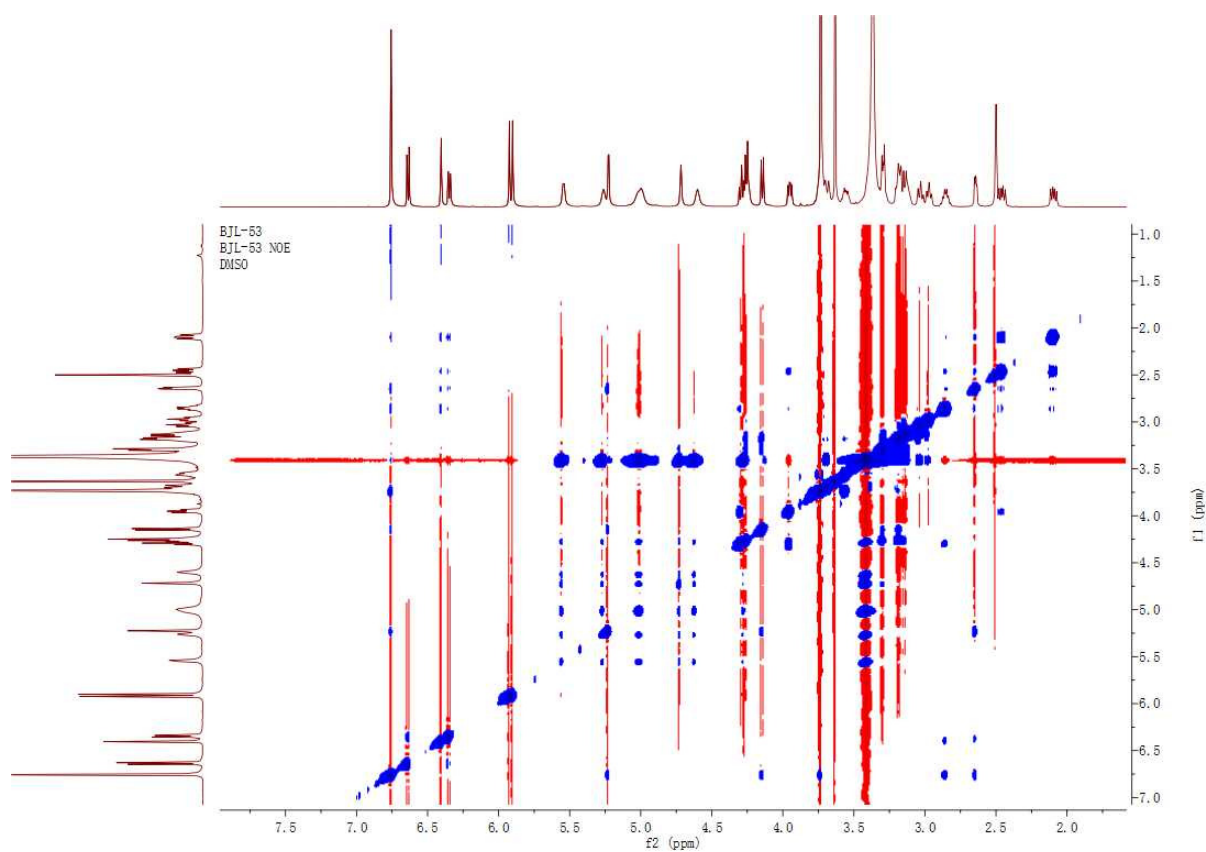

Figure S7. NOESY spectrum of **1**

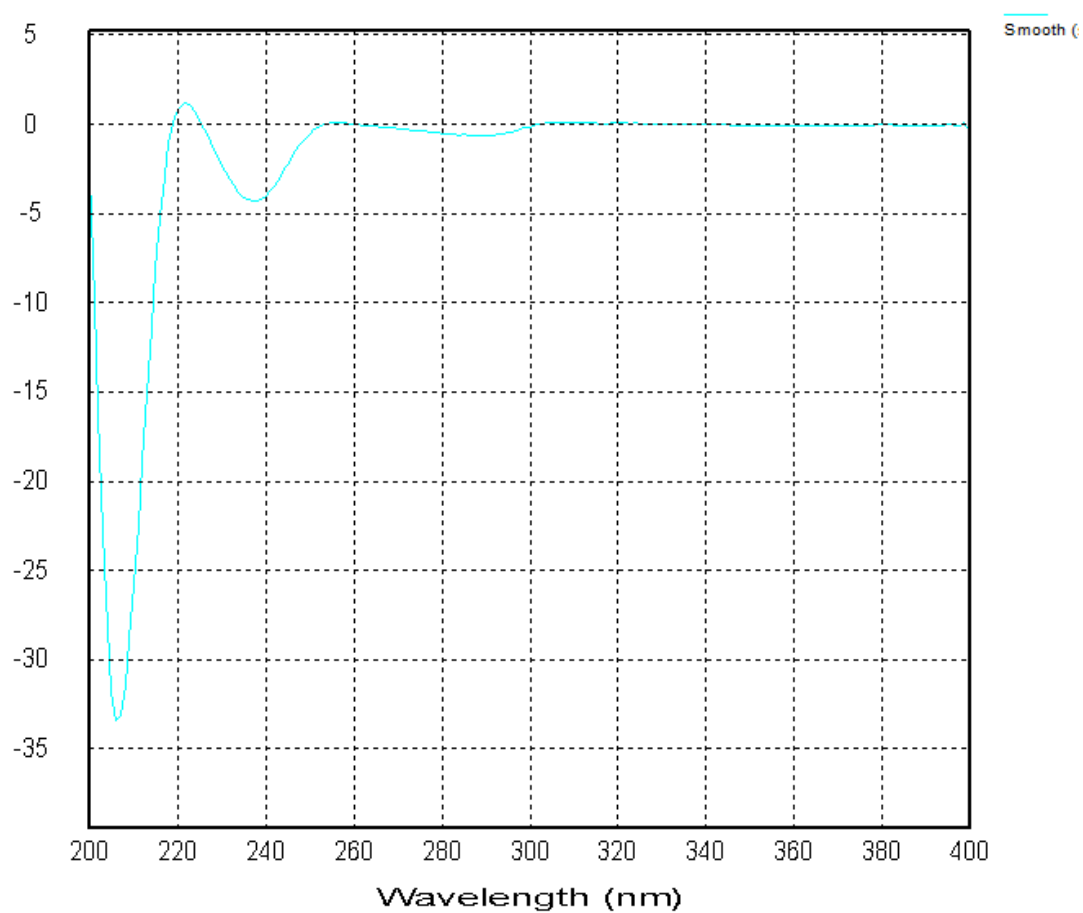

Figure S8. ECD spectrum of **1**

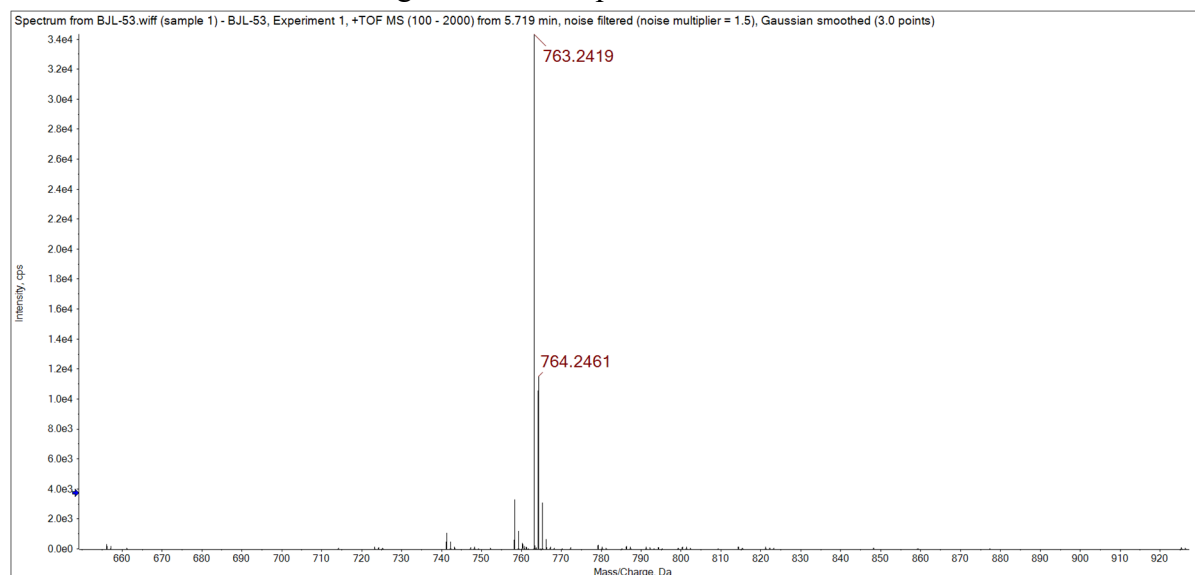

Figure S9. HR-ESI-MS spectrum of **1**

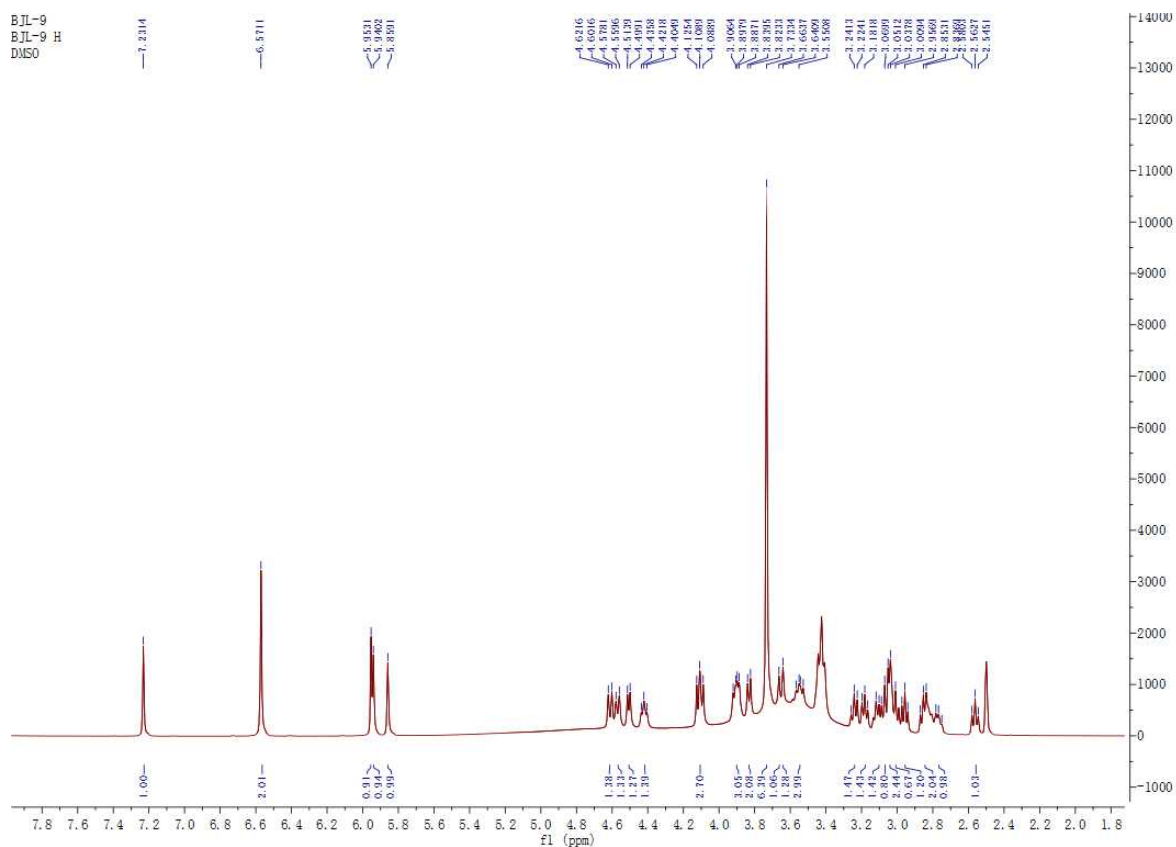

Figure S10.  $^1\text{H}$  NMR spectrum of **2** (500 MHz, DMSO- $d_6$ )

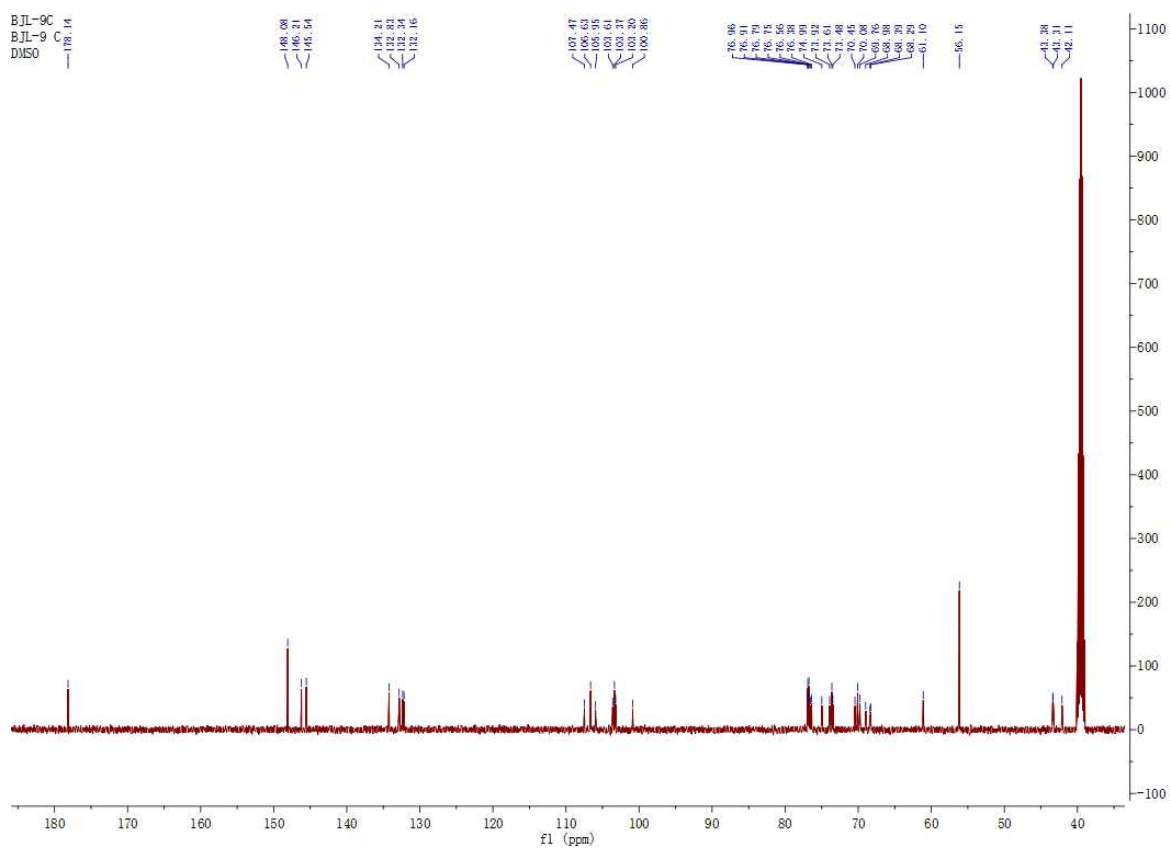



Figure S11.  $^{13}\text{C}$  NMR spectrum of **2** (125 MHz,  $\text{DMSO-}d_6$ )

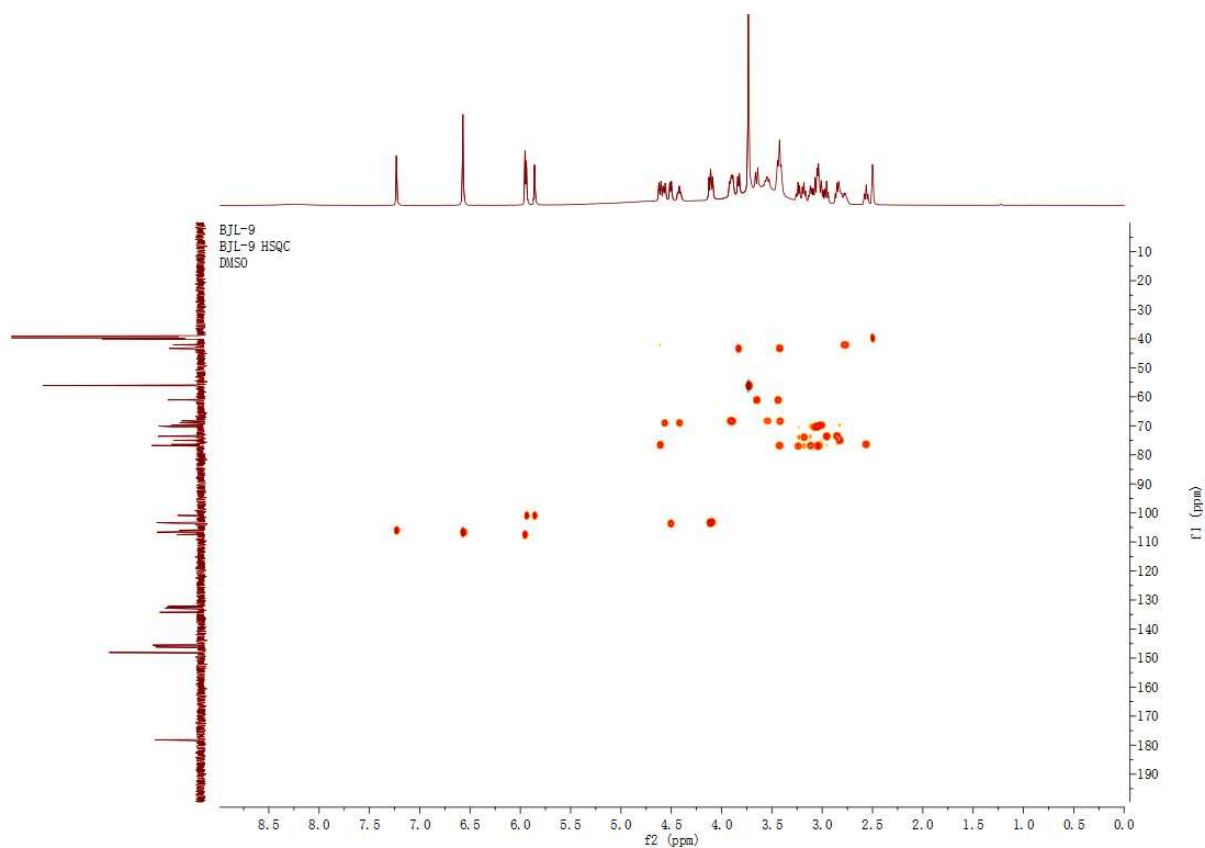

Figure S12. HSQC spectrum of **2**

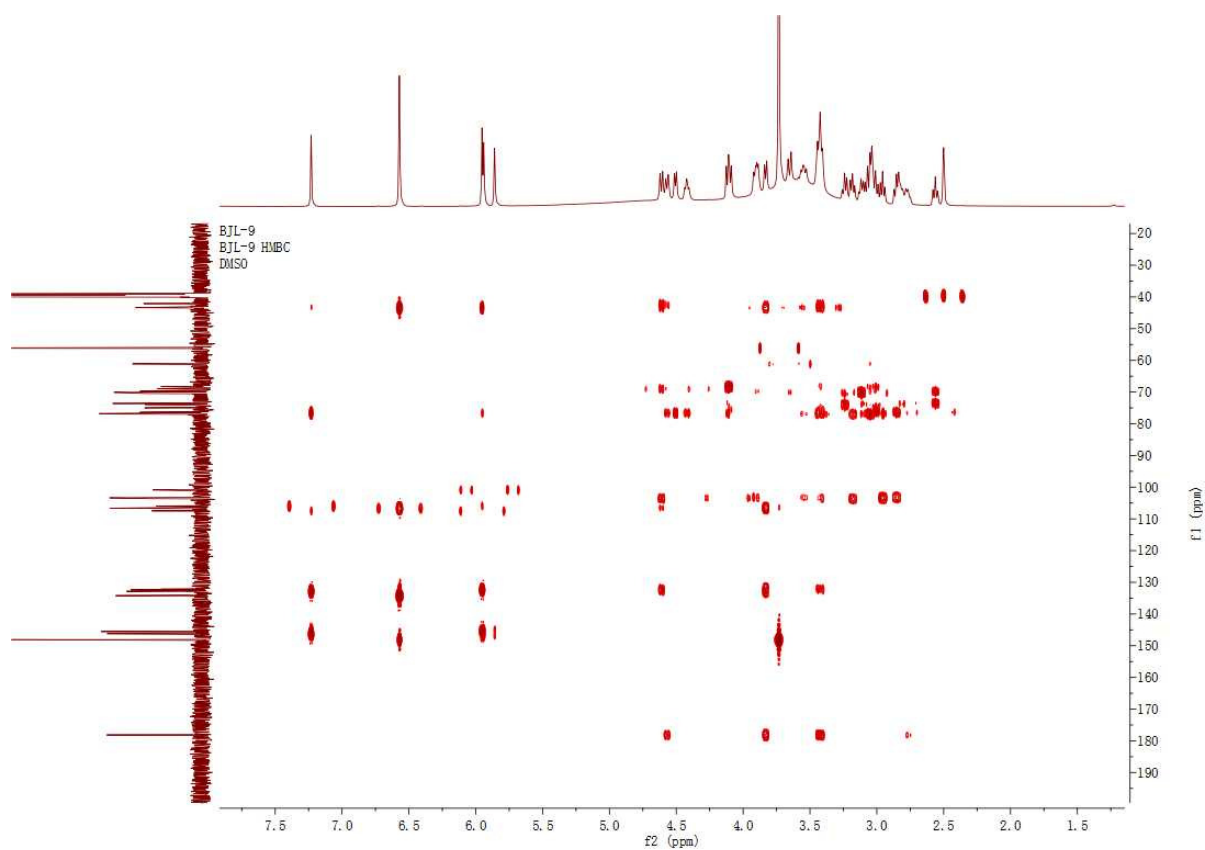

Figure S13. HMBC spectrum of **2**

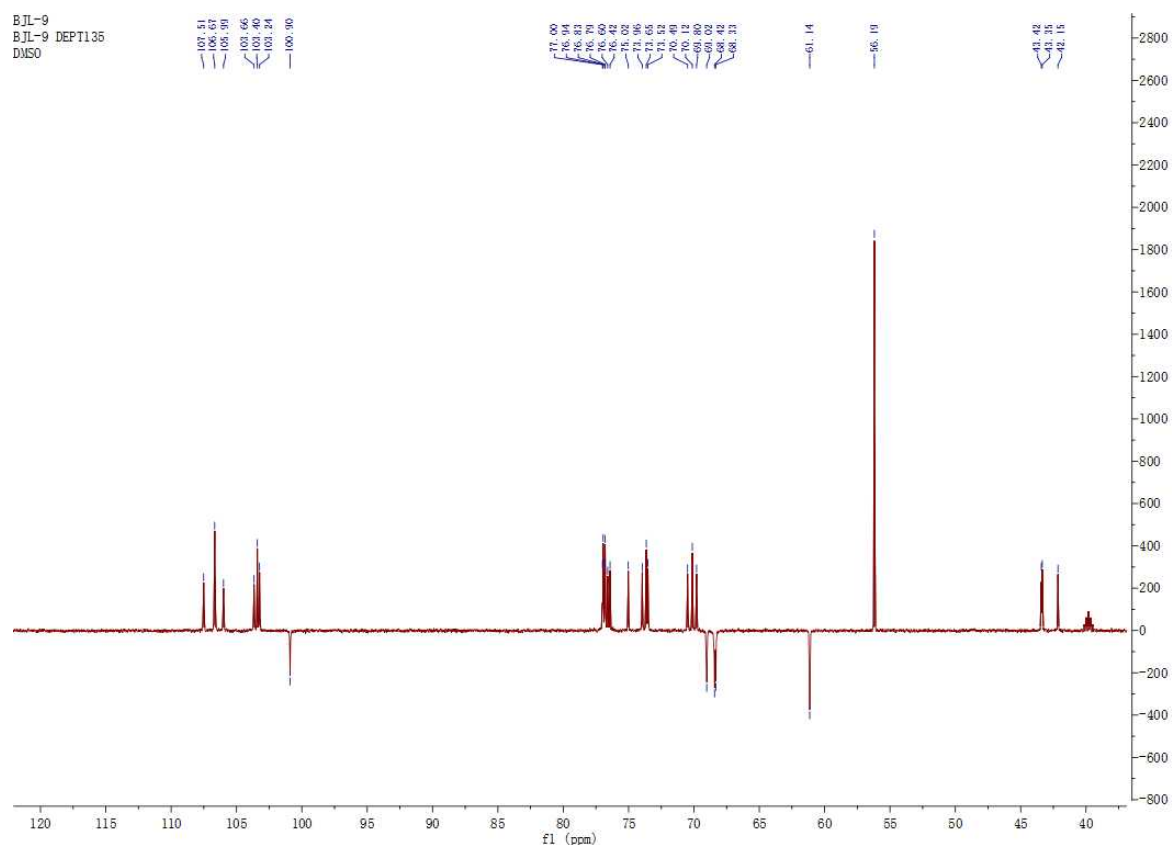

Figure S14. DEPT spectrum of **2**

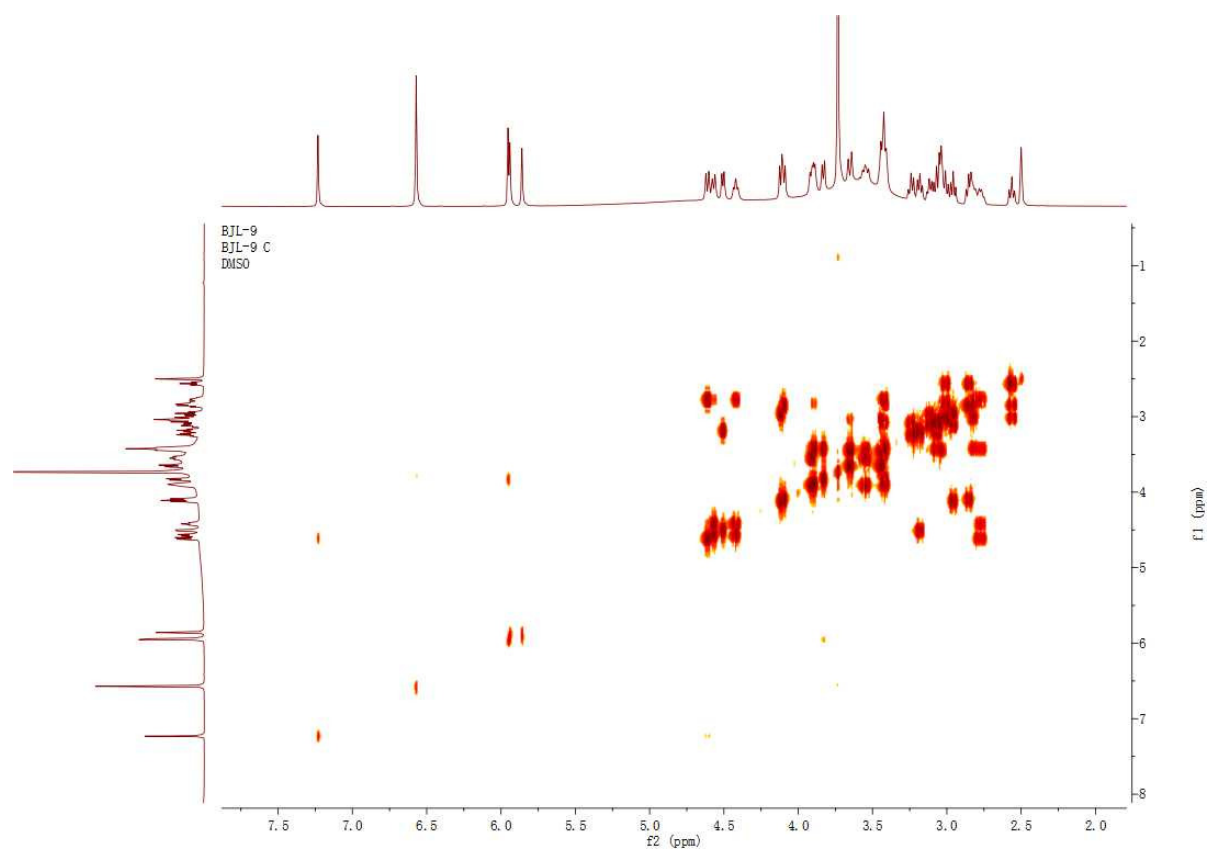

Figure S15.  $^1\text{H}$ - $^1\text{H}$ -COSY spectrum of **2**

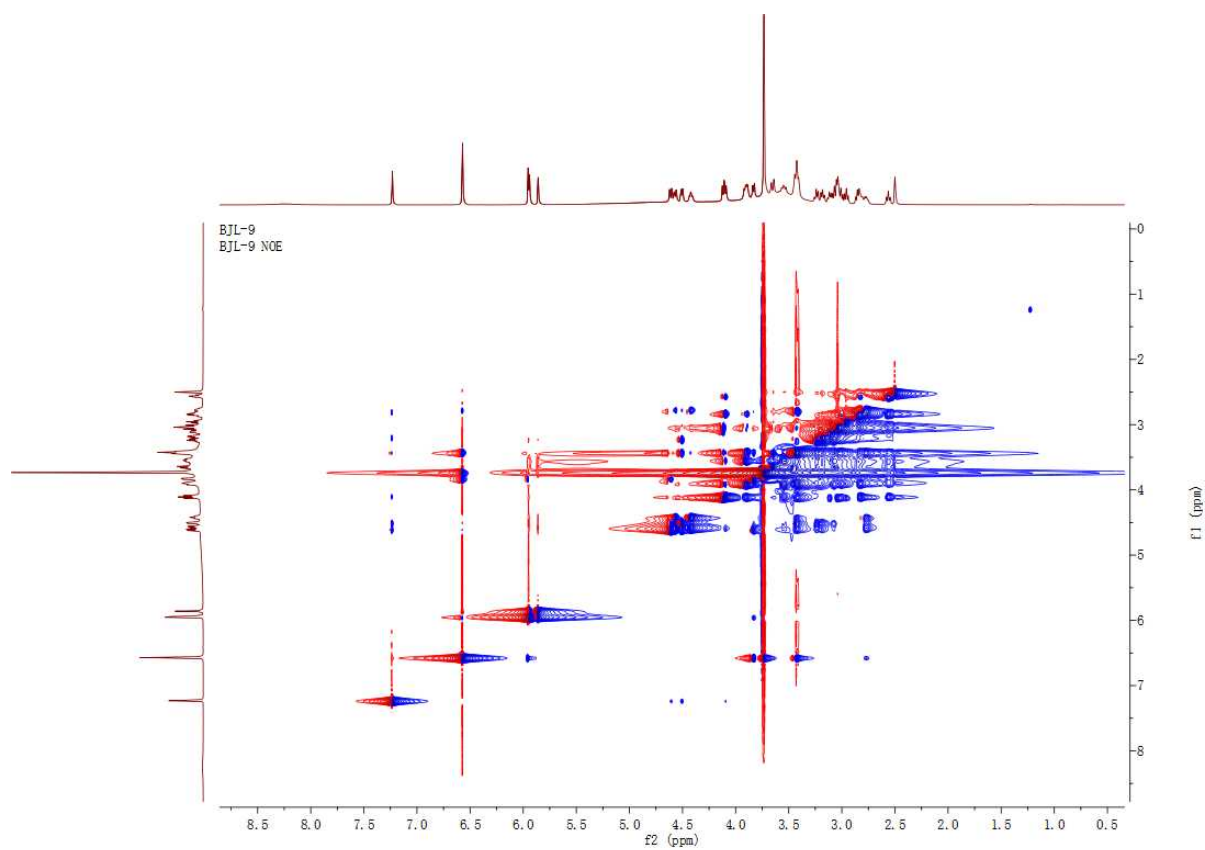

Figure S16. NOESY spectrum of **2**

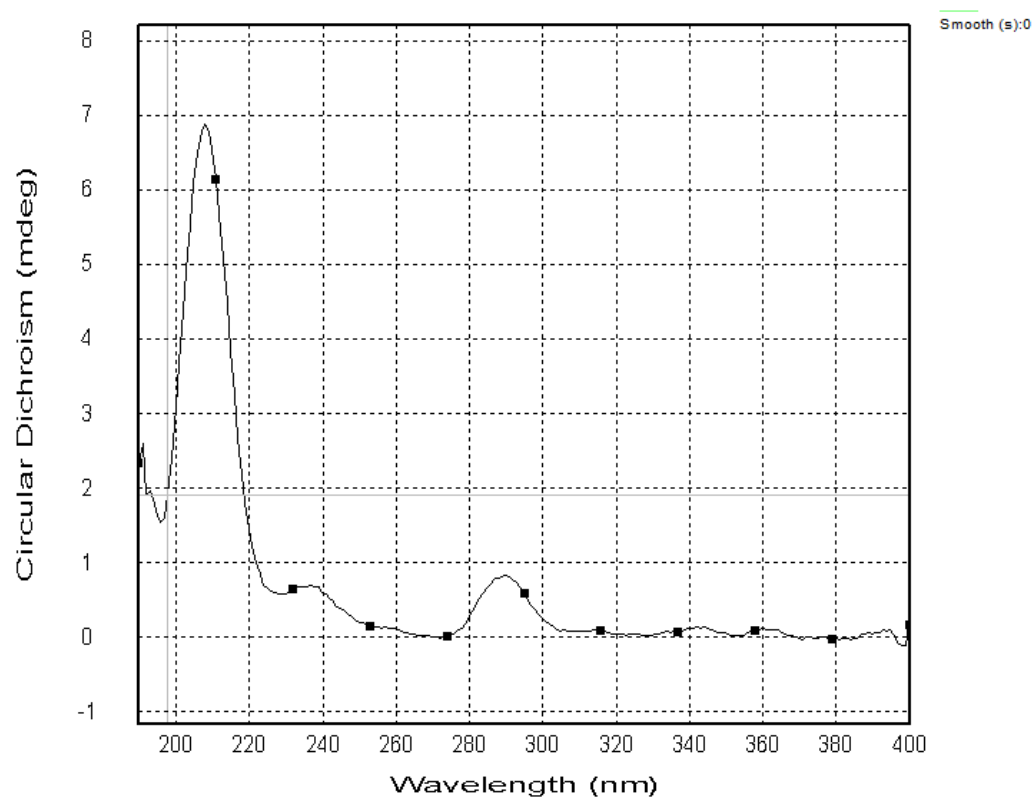

Figure S17. ECD spectrum of **2**

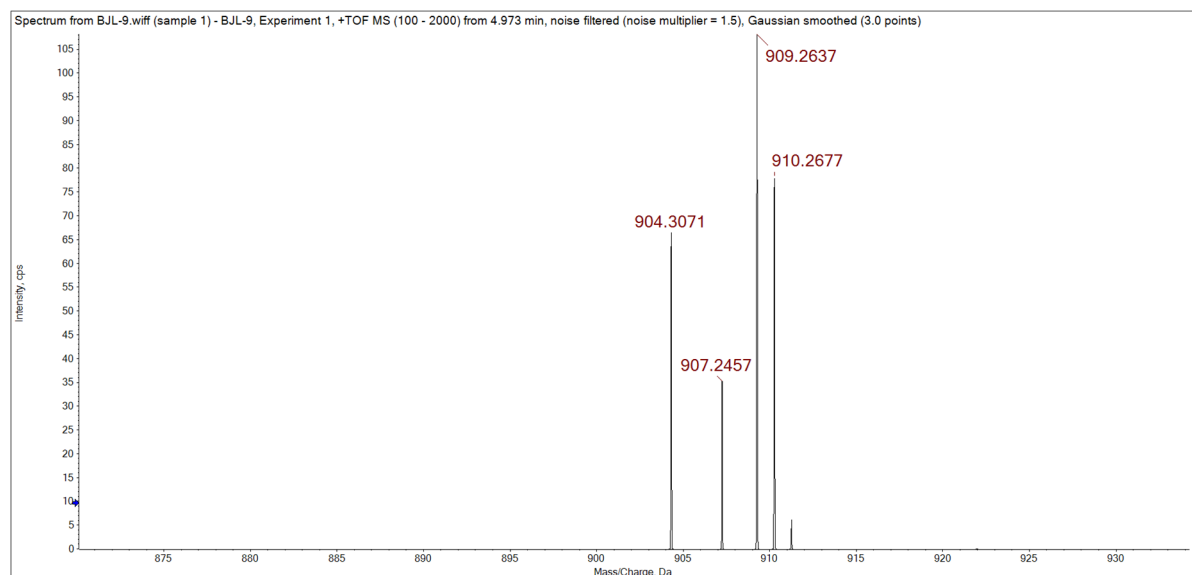

Figure S18. HR-ESI-MS spectrum of **2**

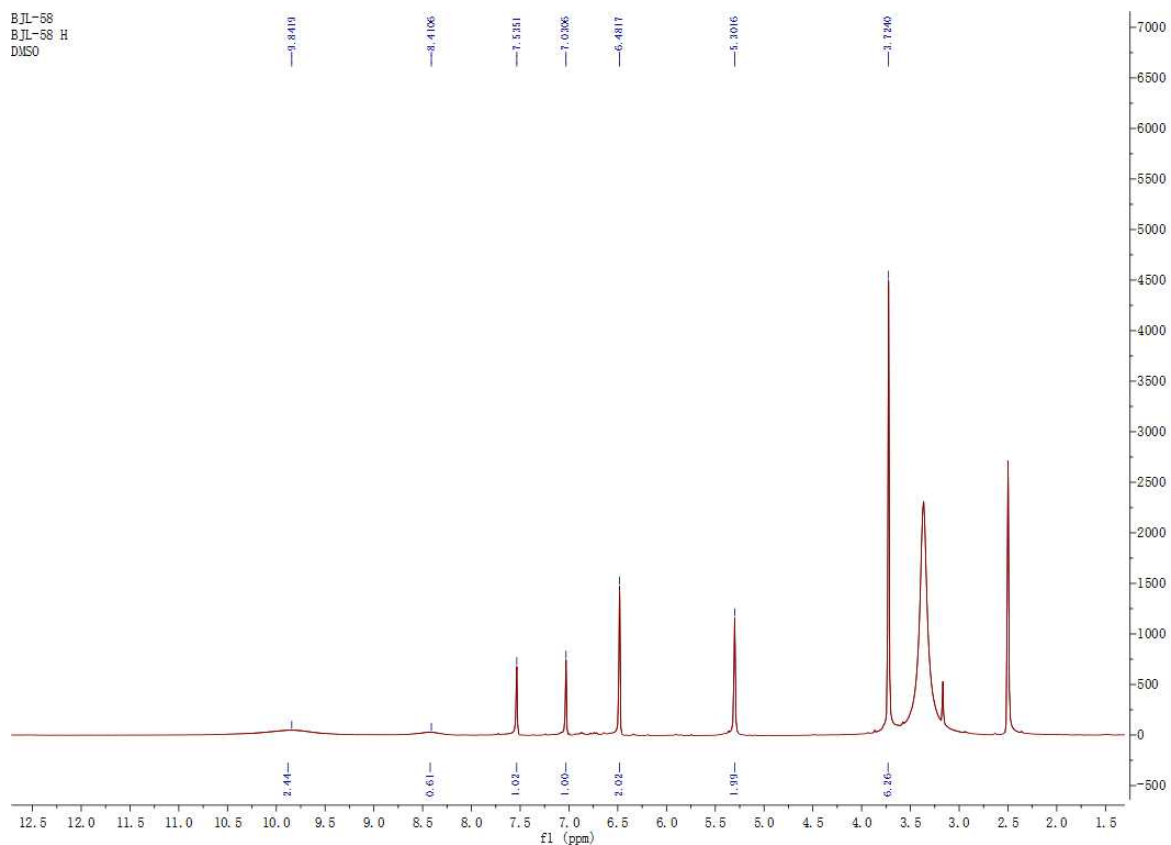

Figure S19.  $^1\text{H}$  NMR spectrum of **3** (500 MHz,  $\text{DMSO-}d_6$ )

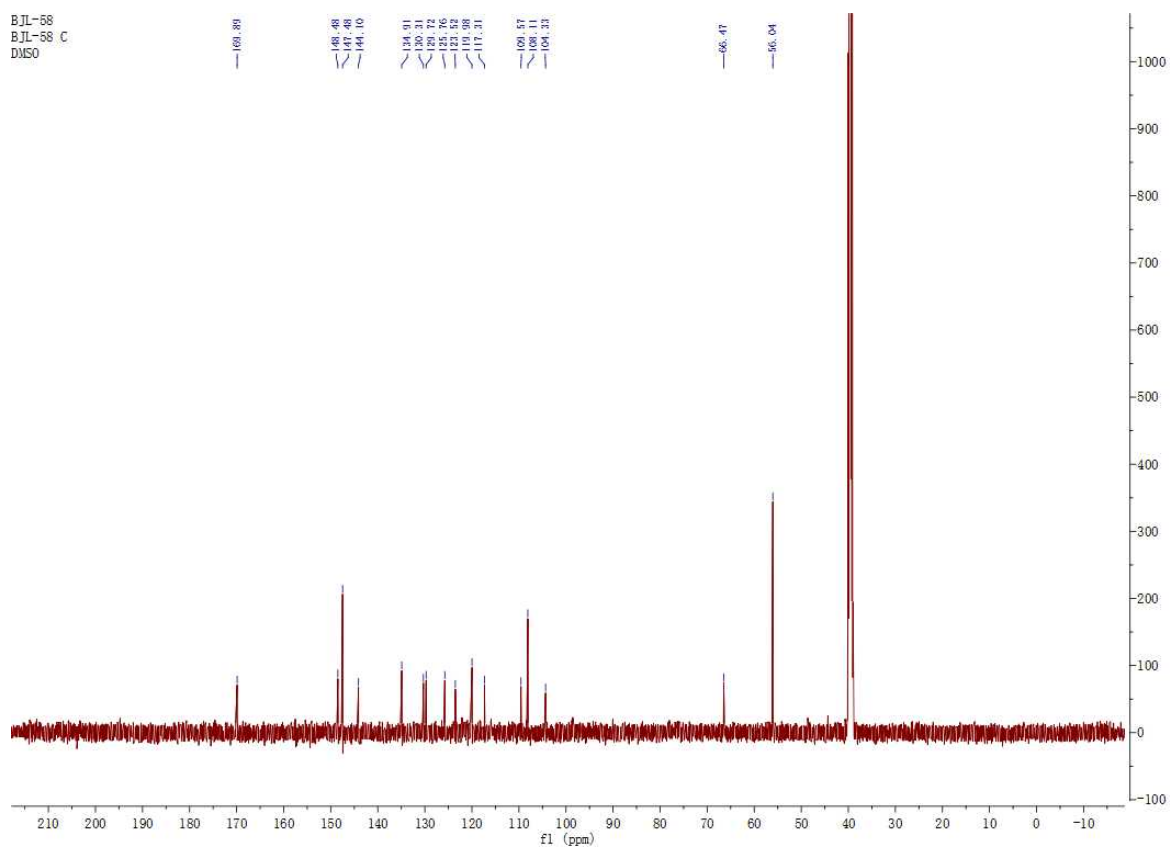

Figure S20.  $^{13}\text{C}$  NMR spectrum of **3** (125 MHz,  $\text{DMSO-}d_6$ )

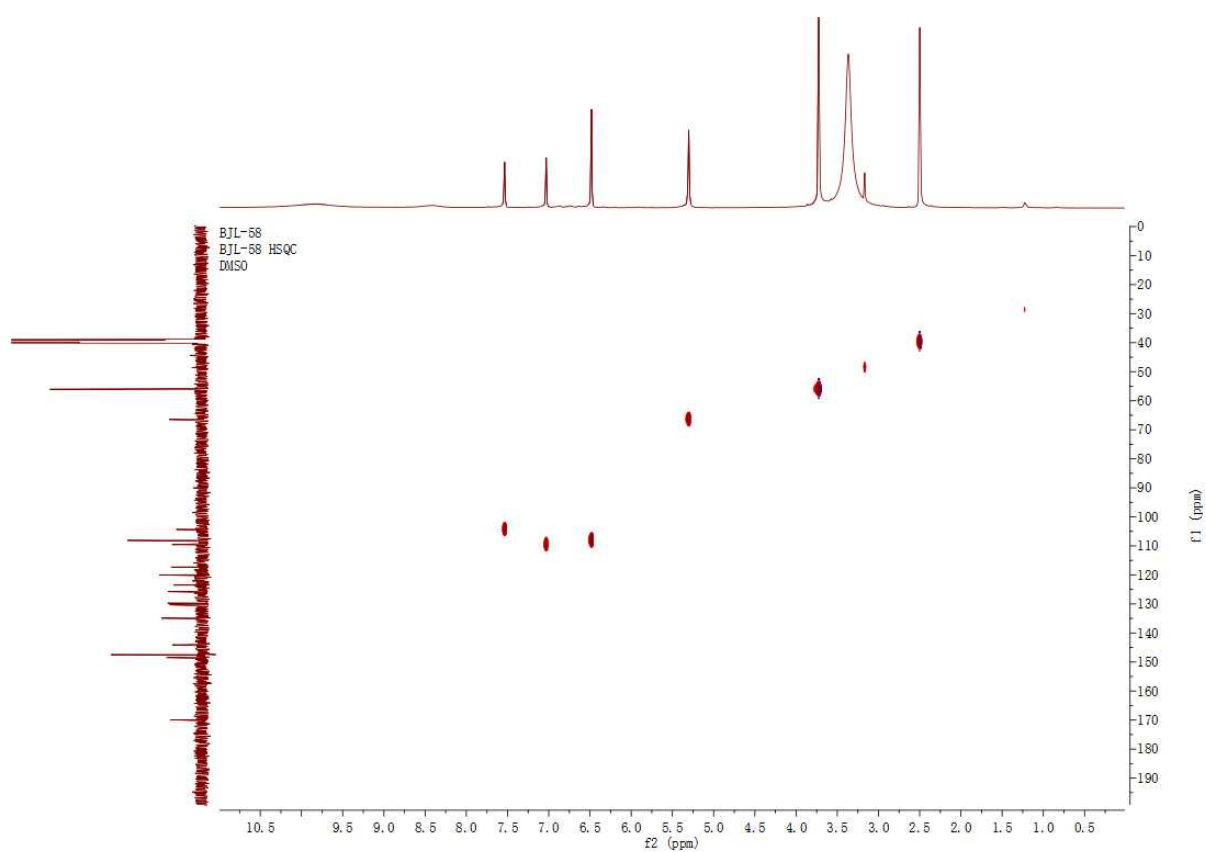

Figure S21. HSQC spectrum of **3**

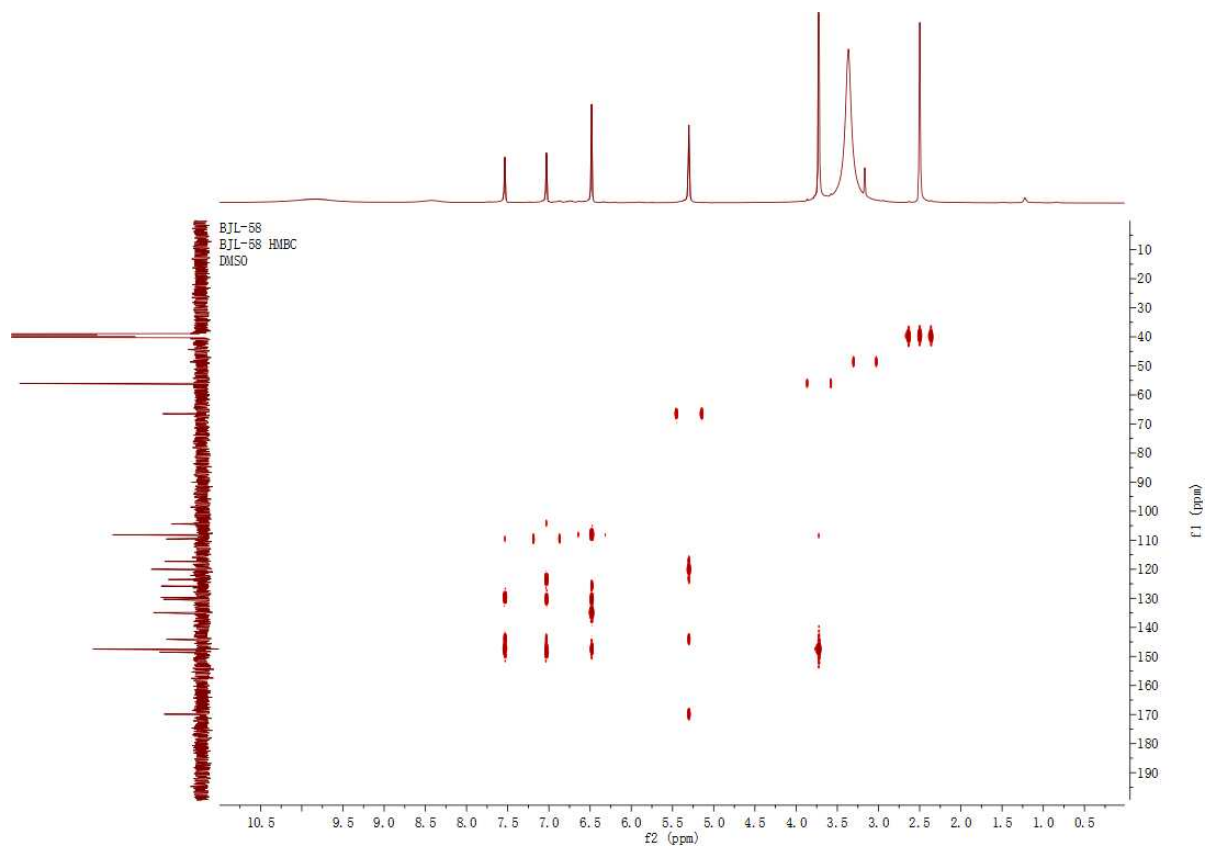

Figure S22. HMBC spectrum of **3**

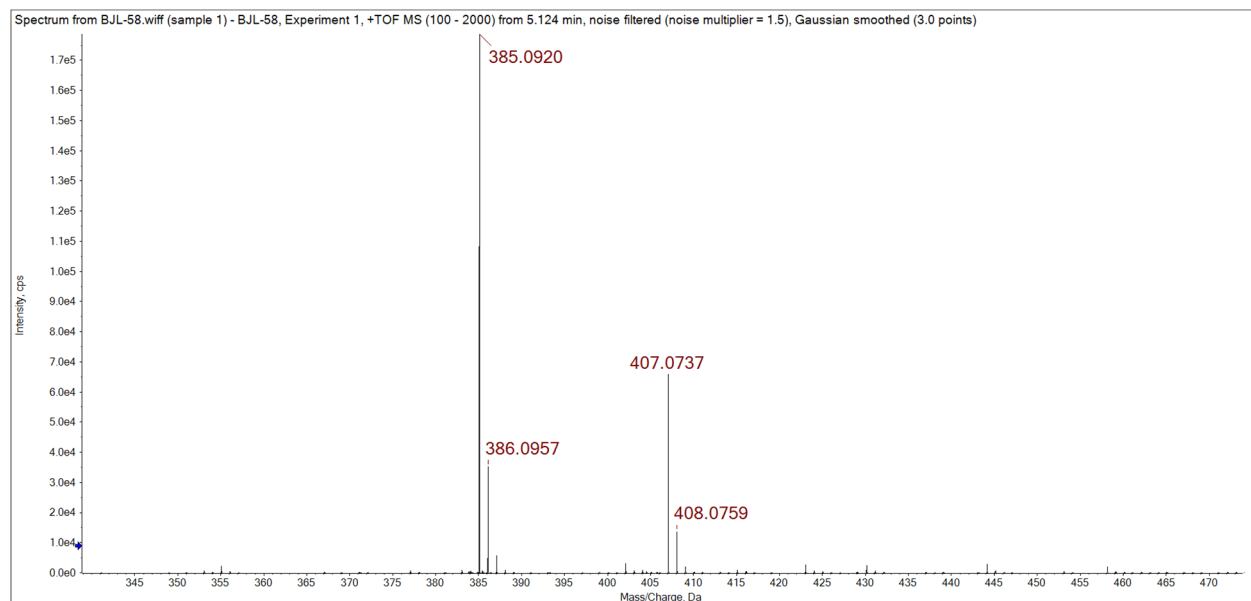

Figure S23. HR-ESI-MS spectrum of **3**

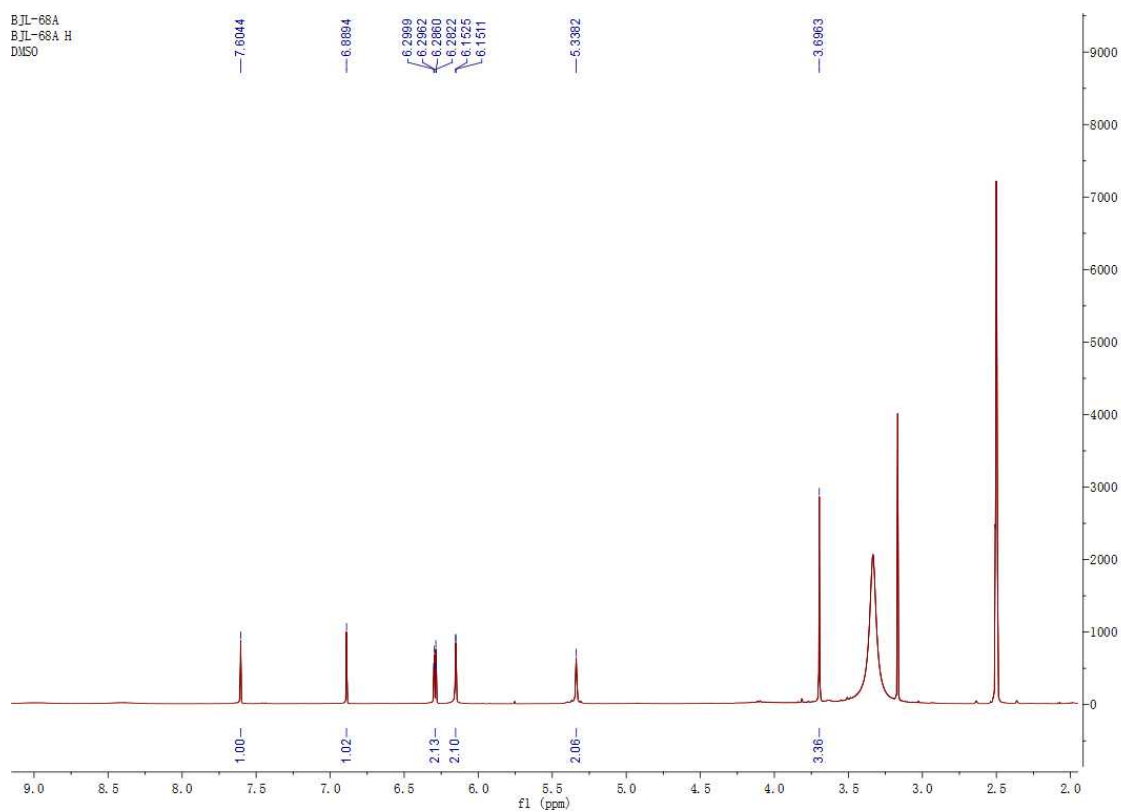

Figure S24. <sup>1</sup>H NMR spectrum of **4** (500 MHz, DMSO-*d*<sub>6</sub>)

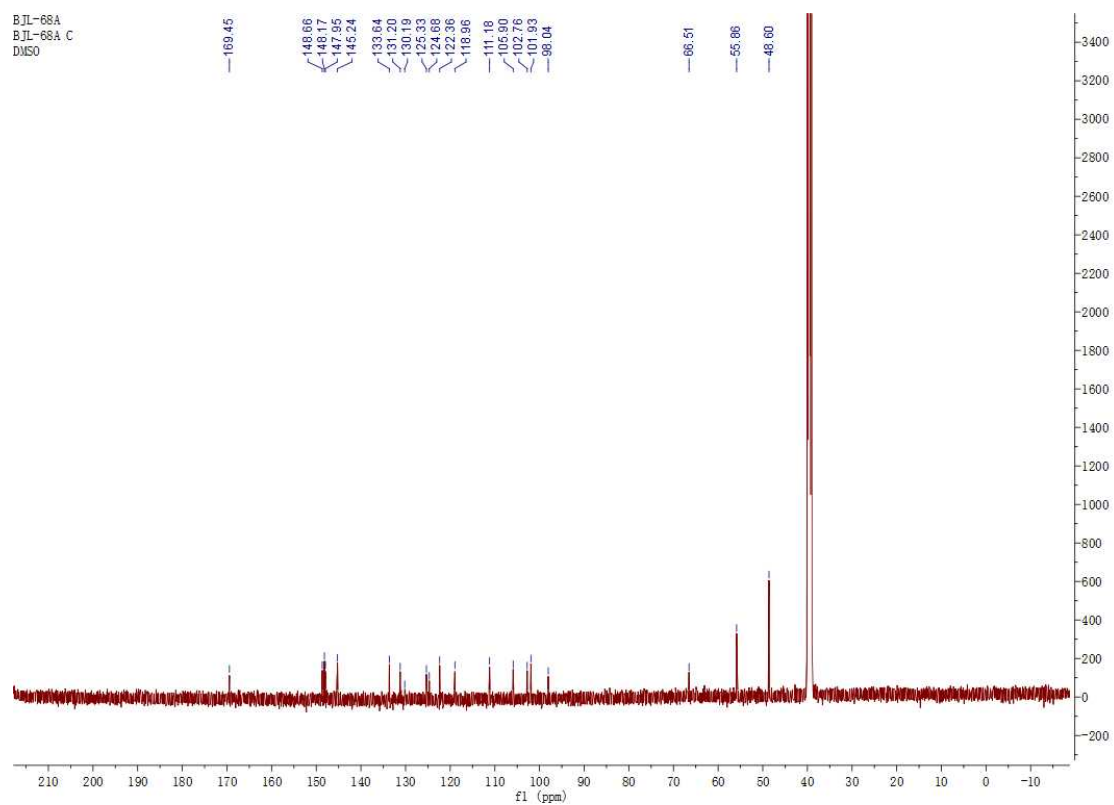

Figure S25.  $^{13}\text{C}$  NMR spectrum of **4** (125 MHz,  $\text{DMSO-}d_6$ )

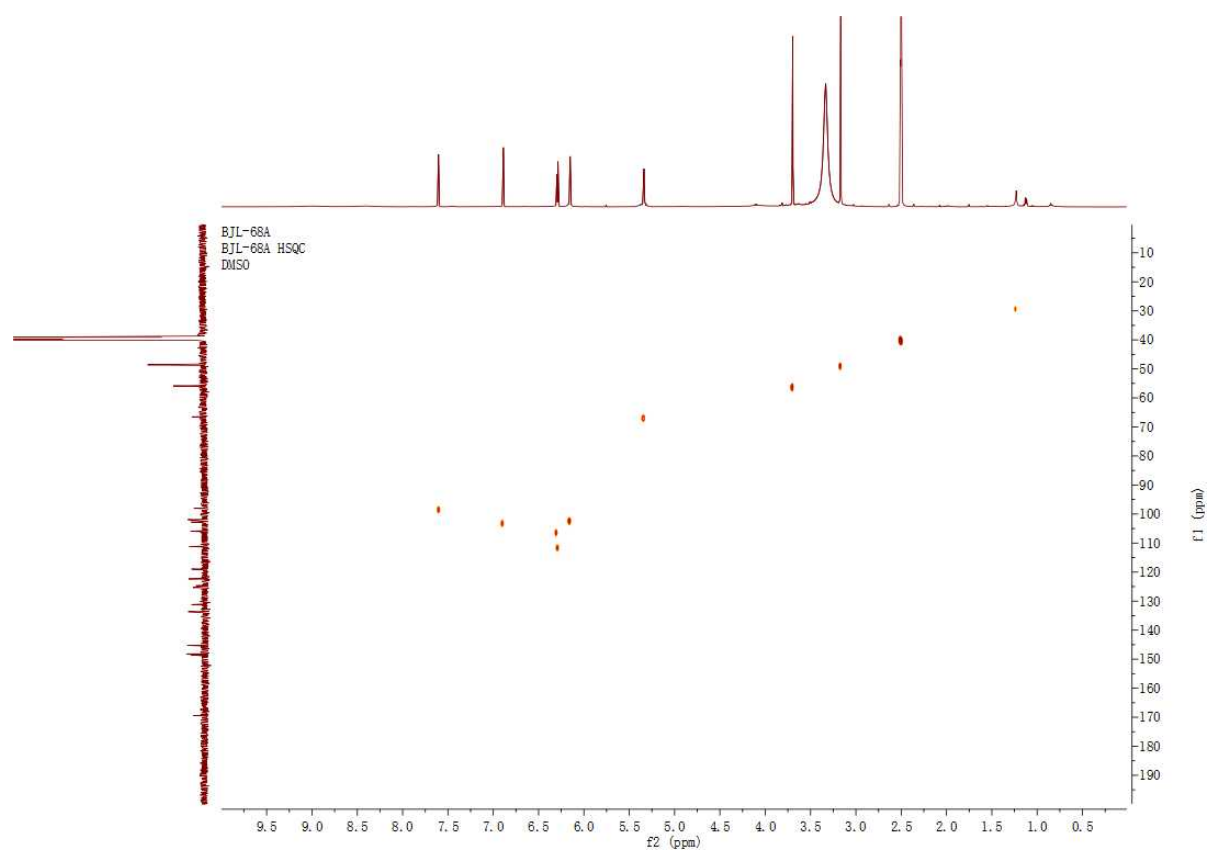

Figure S26. HSQC spectrum of **4**



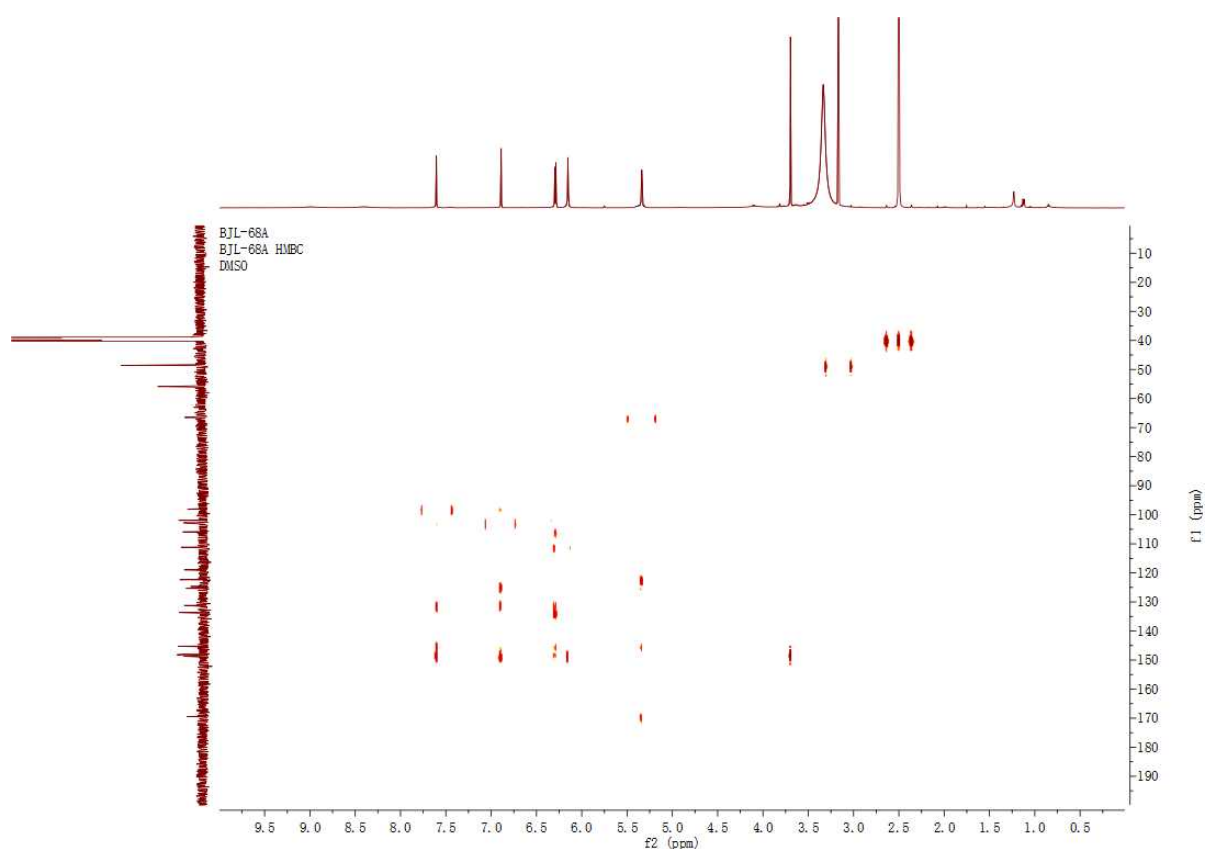

Figure S27. HMBC spectrum of **4**

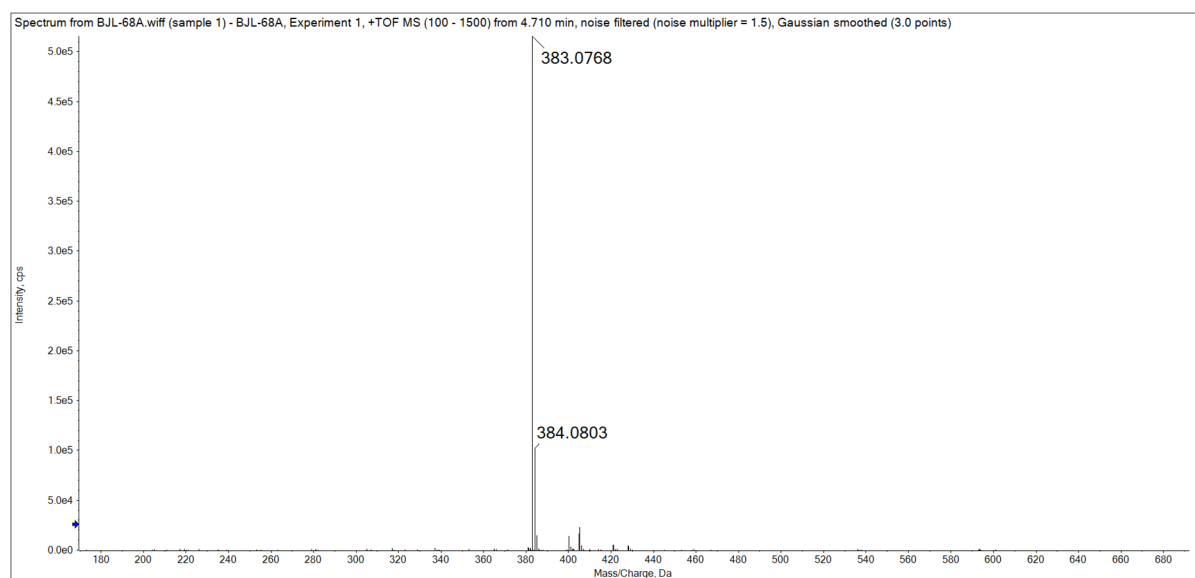

Figure S28. HR-ESI-MS spectrum of **4**
